# Supplementary material
Source: Springer Nature journal article supplement (https://www.springermedizin.de/resource/supplementary/12899_2011_183_MOESM7_ESM.pdf/9514626)

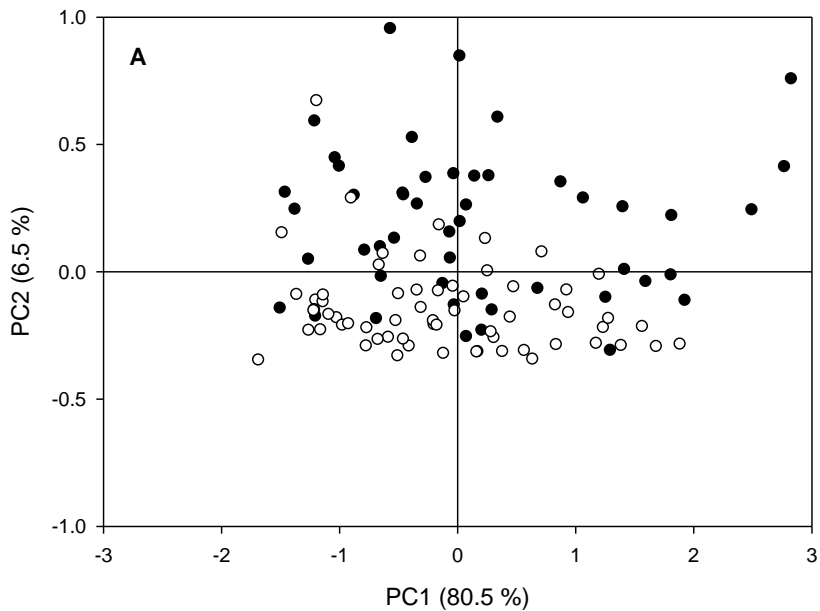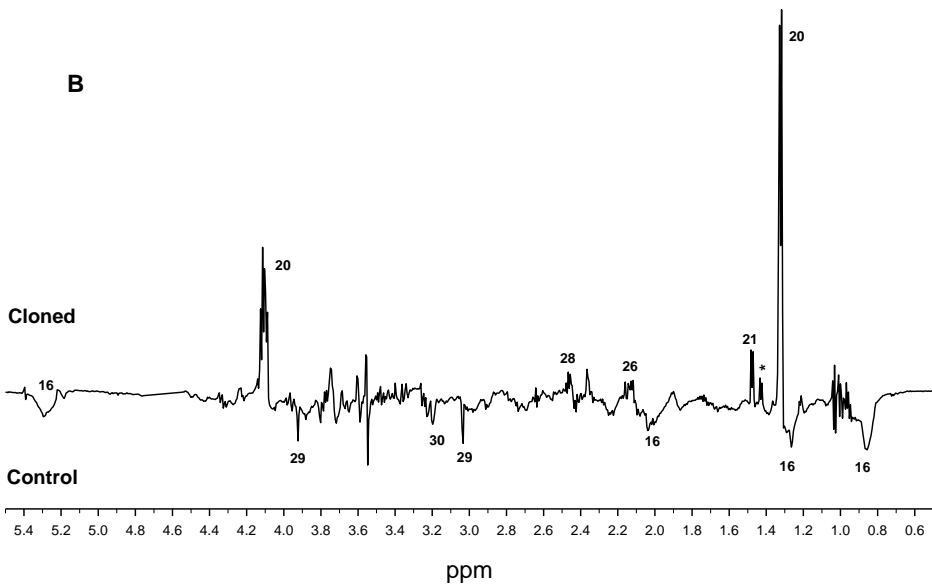

Supplement: MOESM7 [file 9514626]
